# Supplementary material for: Senescence-inducible cell wall and intracellular purple acid phosphatases: implications for phosphorus remobilization in Hakea prostrata (Proteaceae) and Arabidopsis thaliana (Brassicaceae)
Source: PubMed Central journal article supplement (PMC4203141; doi:10.1093/jxb/eru348), 2014-08-28
Supplement: supp_eru348_jexbot130674_file001.pdf [file supp_eru348_jexbot130674_file001.pdf]

**Senescence-inducible cell-wall and intracellular purple acid phosphatases: implications for phosphorus remobilization in *Hakea prostrata* (Proteaceae) and *Arabidopsis thaliana* (Brassicaceae)**

Michael W Shane, Kyla Stigter, Eric Fedosejevs and William C Plaxton

**Supplementary Figure S1.** Differences in cell-wall thickness and dry matter content of leaves and proteoid rootlets of harsh hakea. Representative cross-sections of mature leaf (A) and proteoid rootlet (B) Bars = 50  $\mu\text{m}$ . (C) Proteoid root and leaf dry matter content as a proportion of fresh weight. Y = young (expanding) leaves; NS = non-senescent, fully mature leaves; S = fully senesced (dead) leaves. All values represent the mean ( $\pm$ SE) of triplicate determinations on  $n=4$  biological replicates.

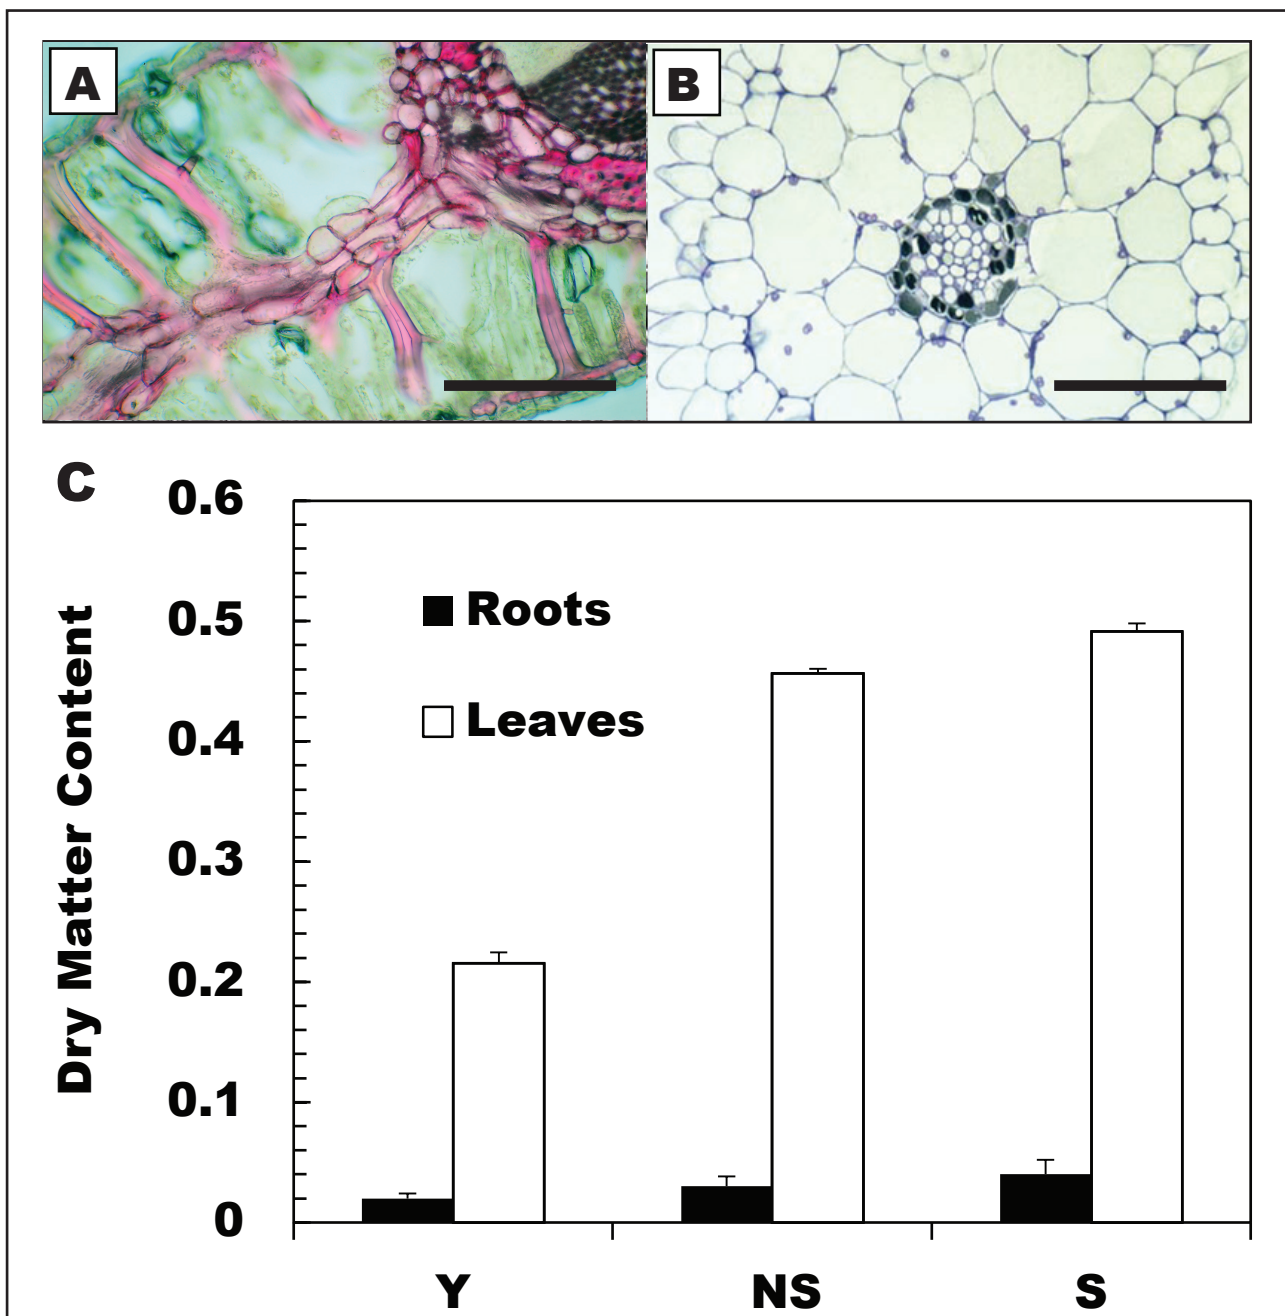

**Supplementary Figure S2.** Immunoblot and SDS-PAGE analysis of intracellular and cell-wall extracts isolated from harsh hakea or *Arabidopsis* leaves. Intracellular (IN) and cell-wall (CW) proteins extracted from harsh hakea (A, B) and *Arabidopsis* (C,D) leaves were resolved using 10% SDS-PAGE mini-gels (30 µg protein/lane) and subjected to immunoblot analysis using anti-(castor bean aldolase, Hodgson and Plaxton,1998) or anti-(castor bean PEP carboxylase, Uhrig *et al.*, 2008) immune serum (A,C), or Sypro-Red staining (B,D) to visualize total protein. *M*, molecular mass standards. 'Pure PEPC' and 'Pure Ald' represent 100 ng of homogeneous PEP carboxylase (Uhrig *et al.*, 2008) or aldolase (Hodgson and Plaxton,1998) isolated from endosperm of developing castor beans.

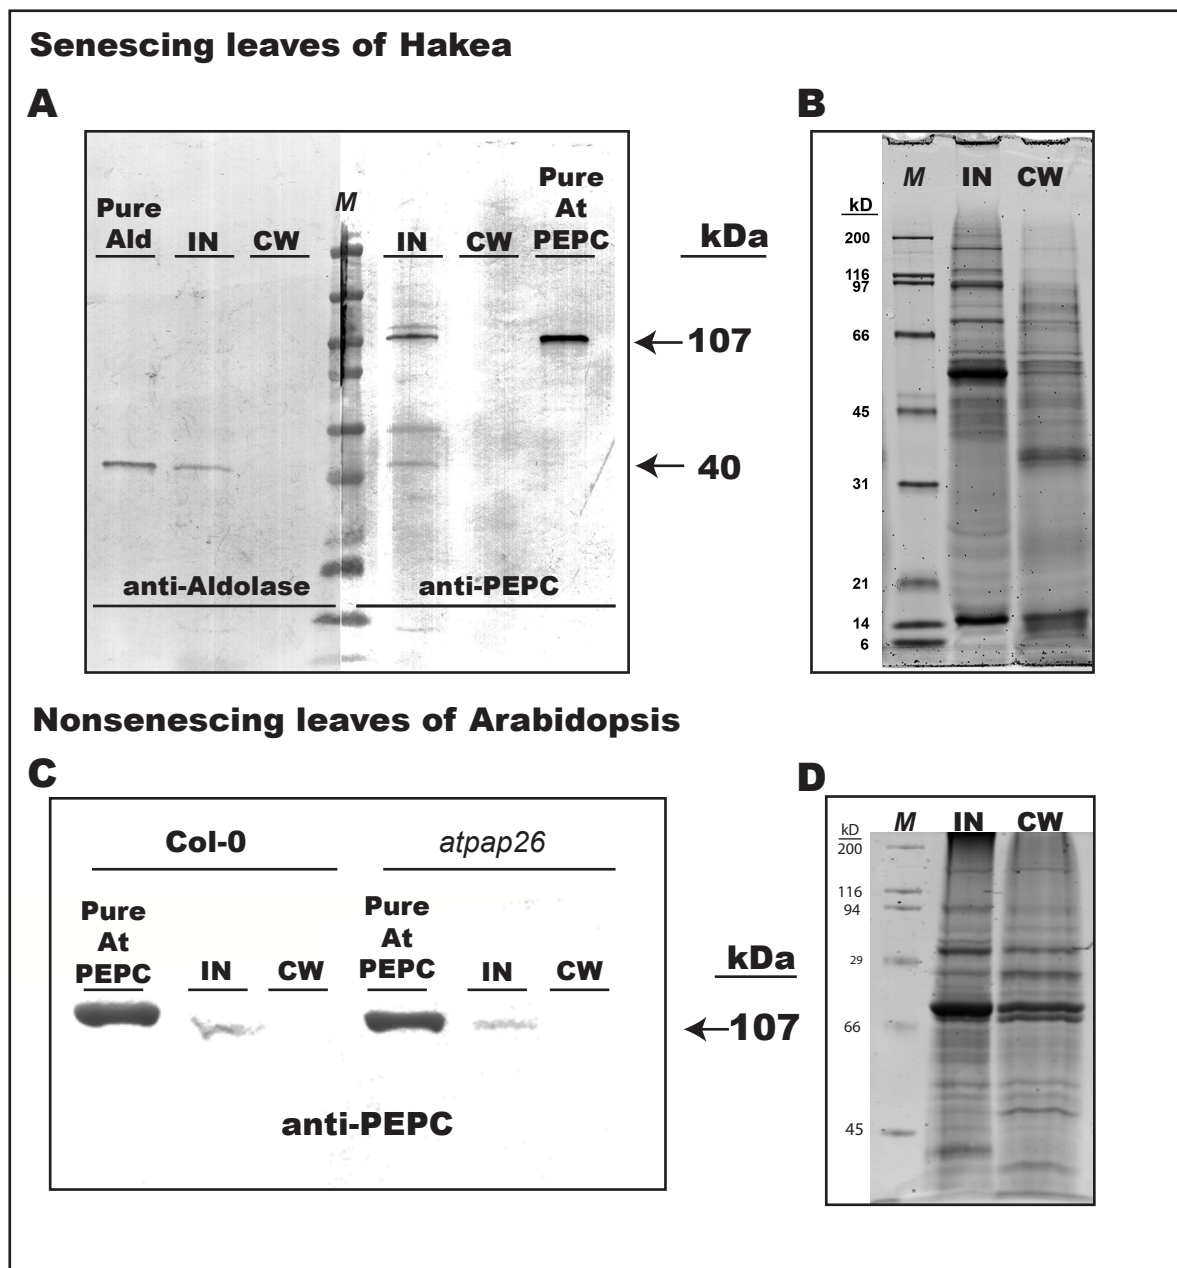

**Supplementary Figure S3.** Phosphatase activities of partially purified HpPAP1 and HpPAP2 as a function of assay pH. Assays were buffered by a mixture of 25mM sodium acetate, 25 mM MES, and 25 mM Bis-tris-Propane and employed 5 mM PEP as the substrate. All values represent the means ( $\pm$ SE) of  $n=4$  separate determinations and were reproducible to within  $\pm 10\%$  of the mean value.

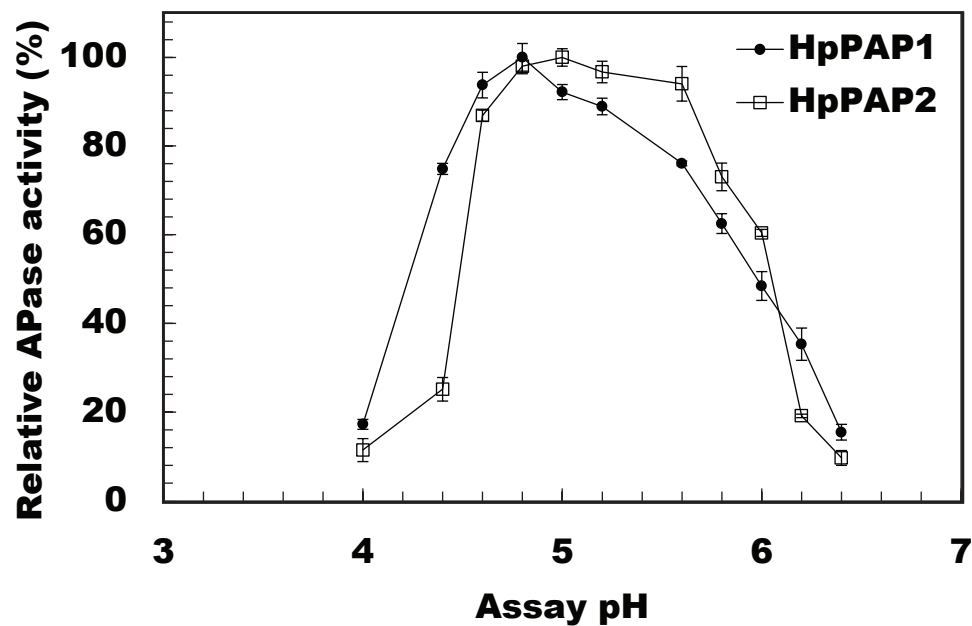

**Supplementary Table S1.** *Purification of APases from 20 g of senescing harsh hakea leaves*

| Step                                                          | Total Volume | Activity     | Protein   | Specific Activity            | Purification | Yield    |
|---------------------------------------------------------------|--------------|--------------|-----------|------------------------------|--------------|----------|
|                                                               | <i>ml</i>    | <i>units</i> | <i>mg</i> | <i>Units mg<sup>-1</sup></i> | <i>-fold</i> | <i>%</i> |
| Clarified extract                                             | 55           | 13           | 258       | 0.05                         | 1            | 100      |
| (NH <sub>4</sub> ) <sub>2</sub> SO <sub>4</sub> fractionation | 21           | 5.4          | 63        | 0.08                         | 1.6          | 42       |
| Butyl-Sepharose*                                              | 3            | 0.87         | 4.8       | 0.18                         | 3.6          | 7        |
| Mono-S* (HpPAP1)                                              | 0.40         | 0.30         | 0.76      | 0.40                         | 8            | 2        |
| Mono-Q* (HpPAP2)                                              | 0.40         | 0.61         | 0.18      | 3.40                         | 68           | 5        |

\*concentrated fractions

**Supplementary Table S2.** *Effect of various substances on the activity of HpPAP1 and HpPAP2 partially purified from senescing leaves of harsh hakea*

The standard APase assay was used with 5 mM PEP as the substrate but lacking added MgCl<sub>2</sub>. Enzyme activity in the presence of each substance (5 or 10 mM) is expressed relative to the respective control determined in the absence of any additions (except for 5 mM EDTA) and set at 100%. All values are means of  $n=3$  independent determinations and are reproducible to within  $\pm 10\%$  of the mean value.

| Addition          | Relative Activity (%) |       |               |       |
|-------------------|-----------------------|-------|---------------|-------|
|                   | <i>HpPAP1</i>         |       | <i>HpPAP2</i> |       |
|                   | 5 mM                  | 10 mM | 5 mM          | 10 mM |
| MgCl <sub>2</sub> | 172                   | 170   | 107           | 112   |
| NaF               | 33                    | 20    | 15            | 11    |
| Vanadate          | 48                    | 41    | 61            | 20    |
| Molybdate         | 11                    | 8     | 6             | 5     |
| P <sub>i</sub>    | 35                    | 28    | 68            | 51    |
